# Supplementary material for: Hydrogel-enriched salivary exosomal microRNAs: reliable biomarkers for head and neck squamous cell carcinoma
Source: Research Square preprint supplement (doi:10.21203/rs.3.rs-7935460/v1), 2025-11-14

**Supplementary Information**

**Table S1. Discovery Cohort.** Summary of demographic and clinical features for patients with HNSCC (n=39) and control participants (n=17) included in the discovery phase of the study.

|  | **Patients with HNSCC (n=39)** | **Controls (n=17)** |
| --- | --- | --- |
| **Age (years)** | **69.5** | **60.7** |
| **Sex(M/F)** | **32/7** | **11/6** |
| **Subsite** | | |
| **Oral Cavity** | **12** |  |
| **Larynx** | **10** |  |
| **Oropharynx** | **6** |  |
| **Hypopharynx** | **6** |  |
| **Others** | **5** |  |
| **TNM staging** | | |
| **T1-2** | **10** |  |
| **T3-4** | **10** |  |
| **N0** | **13** |  |
| **N+** | **7** |  |
| **Stage I-II** | **11** |  |
| **Stage III-IV** | **9** |  |
| **HPV** | | |
| **+** | **4** |  |
| **-** | **19** |  |

**Table S2. Validation Cohort.** Summary of demographic and clinical features for patients with HNSCC (n=39) and control participants (n=17) included in the validation phase of the study.

|  | **Patients with HNSCC (n=69)** | **Controls (n=25)** |
| --- | --- | --- |
| **Age (years)** | **69 (22-91)** | **59.04 (40-80)** |
| **Sex(M/F)** | **57/12** | **17/8** |
| **Subsite** | | |
| **Oral Cavity** | **17** |  |
| **Larynx** | **13** |  |
| **Oropharynx** | **18** |  |
| **Hypopharynx** | **13** |  |
| **Others** | **8** |  |
| **TNM staging** | | |
| **T1-2** | **42** |  |
| **T3-4** | **26** |  |
| **N0** | **31** |  |
| **N+** | **37** |  |
| **Stage I-II** | **23 (12/11)** |  |
| **Stage III-IV** | **45 (4/41)** |  |
| **HPV** | | |
| **+** | **7** |  |
| **-** | **11** |  |

**Table S3. Comparison of quality control (QC) pass rates between the ultracentrifugation (UC) and hydrogel-based exosome isolation methods.** The table summarizes the number of samples enrolled, passed, and excluded, along with the final sample analysis success rate for the discovery cohort (UC) and the validation cohort (Hydrogel).

| **Characteristic** | **Discovery Cohort (UC)** | **Validation Cohort (Hydrogel)** |
| --- | --- | --- |
| Initial Samples Enrolled (n) | 56 | 94 |
| Samples Passing QC (n) | 32 | 86 |
| Samples Excluded (n) | 24 | 8 |
| **Pass Rate (%)** | **57.1%** | **91.5%** |

**Figure S1. Relative expression of the five validated candidate miRNAs in patients with HNSCC compared between metastasis-positive (N+) and metastasis-negative (N0) groups in the validation cohort.** Statistical significance was determined by Mann-Whitney U-test. *p < 0.05; ns, not significant.


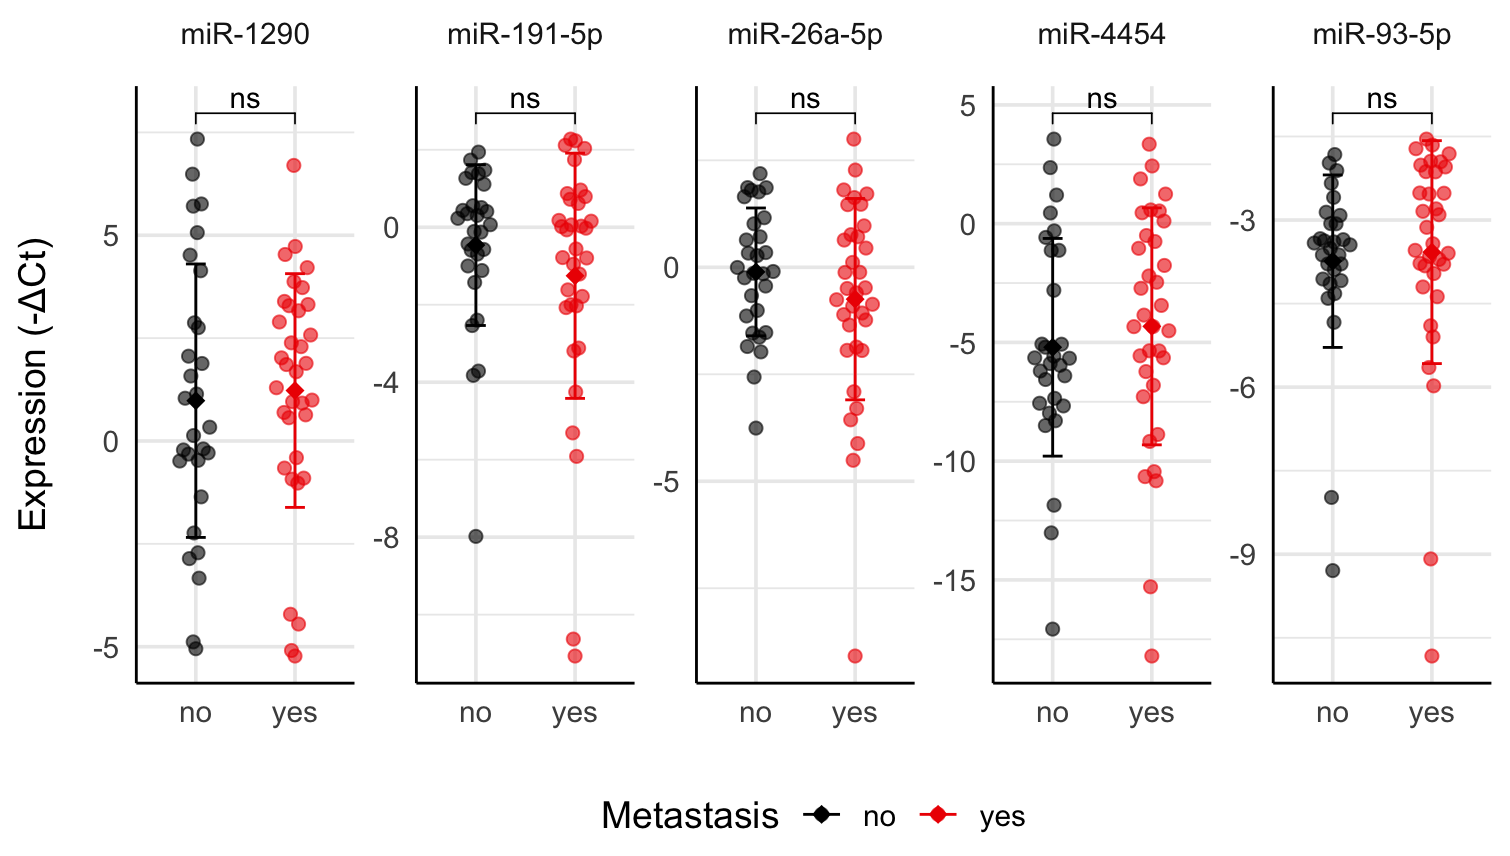


**Table S4. Diagnostic performance of single and combined salivary exosomal miRNA panels.** ROC curve analysis was performed to distinguish patients with HNSCC from controls using individual miRNAs and all possible combinations up to a five-marker panel. This table lists the area under the curve (AUC), 95% confidence interval (CI), and p-values for each combination. The markers were coded as follows: (a) miR-1290, (b) miR-191-5p, (c) miR-26a-5p, (d) miR-4454, and (e) miR-93-5p. *p < 0.05, **p < 0.01, ***p < 0.001, ****p < 0.0001; ns, not significant.

| **Combination** | **AUC** | **CI_lower** | **CI_upper** | **p.value** | **significance** |
| --- | --- | --- | --- | --- | --- |
| Single markers | | | | | |
| miR-1290, (A) | 0.494824 | 0.360994 | 0.628654 | 0.562 | ns |
| miR-191-5p, (B) | 0.518979 | 0.377538 | 0.660419 | 0.408 | ns |
| miR-26a-5p, (C) | 0.687371 | 0.563016 | 0.811725 | 0.001 | ** |
| miR-4454, (D) | 0.529331 | 0.399275 | 0.659386 | 0.313 | ns |
| miR-93-5p, (E) | 0.574879 | 0.435238 | 0.714521 | 0.136 | ns |
| Two-marker panel | | | | | |
| A + D | 0.518979 | 0.365251 | 0.672707 | 0.373 | ns |
| A + B | 0.510007 | 0.362444 | 0.657569 | 0.444 | ns |
| B + D | 0.532091 | 0.397314 | 0.666868 | 0.322 | ns |
| A + C | 0.68668 | 0.562613 | 0.810748 | 0.002 | ** |
| B + C | 0.73775 | 0.613844 | 0.861657 | 0.002 | ** |
| C + D | 0.687371 | 0.563016 | 0.811725 | 0.002 | ** |
| A + E | 0.604555 | 0.465282 | 0.743828 | 0.064 | ns |
| B + E | 0.529331 | 0.38376 | 0.674901 | 0.33 | ns |
| C + E | 0.701863 | 0.576255 | 0.827472 | 0.001 | ** |
| D + E | 0.555556 | 0.420284 | 0.690827 | 0.218 | ns |
| Three-marker panel | | | | | |
| A + B + D | 0.515528 | 0.359323 | 0.671733 | 0.408 | ns |
| A + C + D | 0.68461 | 0.560808 | 0.808413 | 0.001 | ** |
| A + B + C | 0.739821 | 0.614805 | 0.864836 | <0.001 | *** |
| B + C + D | 0.741201 | 0.618944 | 0.863457 | <0.001 | *** |
| A + D + E | 0.575569 | 0.431034 | 0.720105 | 0.144 | ns |
| A + B + E | 0.536232 | 0.388684 | 0.68378 | 0.324 | ns |
| B + D + E | 0.52864 | 0.388603 | 0.668678 | 0.391 | ns |
| A + C + E | 0.706004 | 0.58156 | 0.830449 | 0.001 | ** |
| B + C + E | 0.748102 | 0.625065 | 0.871139 | <0.0001 | *** |
| C + D + E | 0.710145 | 0.586665 | 0.833625 | 0.003 | ** |
| Four-marker panel | | | | | |
| A + B + C + D | 0.740511 | 0.619087 | 0.861934 | <0.0001 | *** |
| A + B + D + E | 0.531401 | 0.380537 | 0.682265 | 0.324 | ns |
| A + C + D + E | 0.711525 | 0.588054 | 0.834996 | 0.003 | ** |
| A + B + C + E | 0.745342 | 0.620002 | 0.870682 | <0.0001 | *** |
| B + C + D + E | 0.752933 | 0.631691 | 0.874175 | <0.0001 | *** |
| Five-marker panel | | | | | |
| A + B + C + D + E | 0.756384 | 0.635682 | 0.877085 | <0.0001 | *** |

**Figure S2. Expression of salivary exosomal miR-26a-5p according to clinical stage in the HNSCC cohort.** Comparison of miR-26a-5p expression levels stratified by T stage (T1-2 vs. T3-4), N stage (N0 vs. N+), and overall cancer stage (I-II vs. III-IV). Expression is presented as -ΔCt values. Statistical significance was determined by the Mann-Whitney U test; ns, not significant.


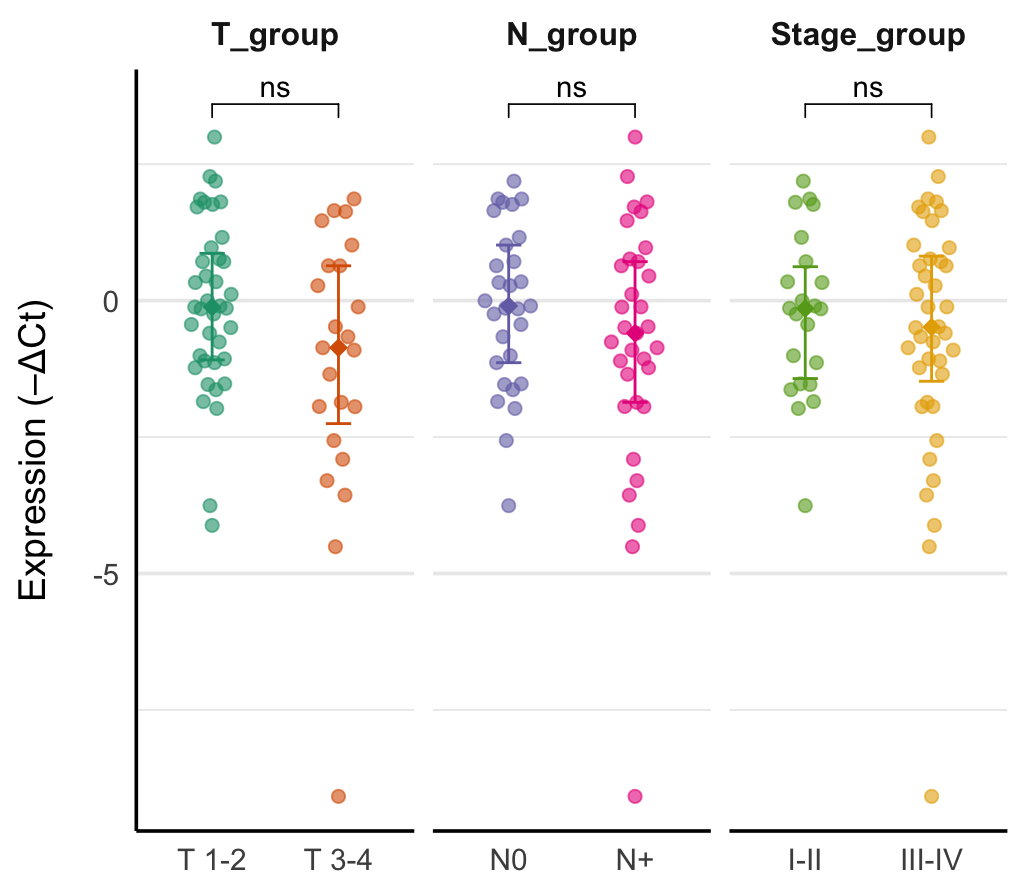


**Figure S3. Expression of salivary exosomal miR-26a-5p according to clinical stage in the oral cavity cancer sub-cohort.** Comparison of miR-26a-5p expression levels stratified by T stage, N stage, and overall cancer stage specifically within the subgroup of patients with oral-cavity cancer. Expression is presented as -ΔCt values. Statistical significance was determined by the Mann-Whitney U test; ns, not significant.


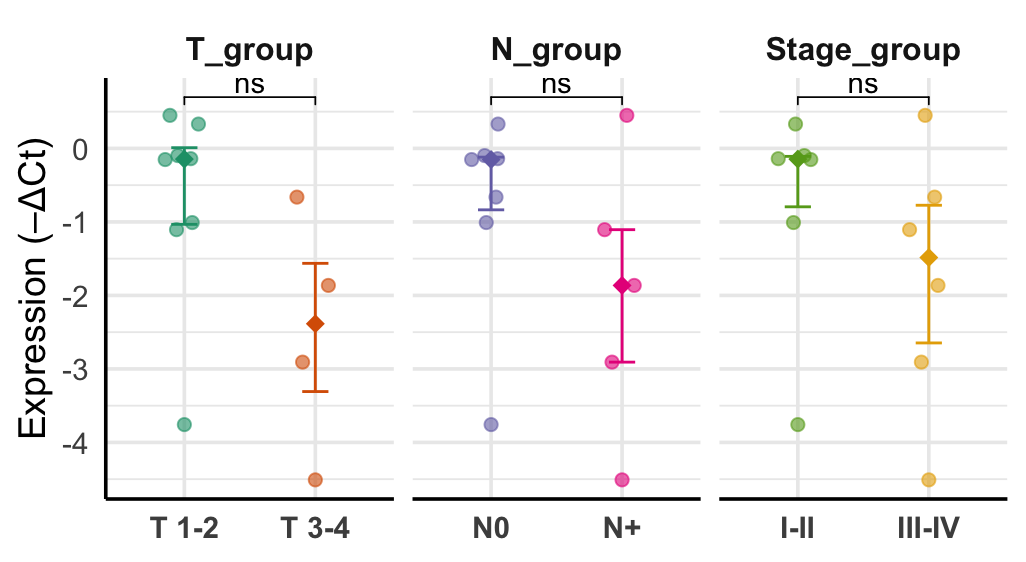

Supplement: Supplementary file 1 [file 743faadee6fb4dae4b77ef83.docx]
